# Supplementary material
Source: PubMed Central journal article supplement (PMC6648909)
Supplement: ao8b03369_si_001.pdf [file ao8b03369_si_001.pdf]

# Tuning the Properties of Iron-doped Porous Graphitic Carbon Synthesized by Hydrothermal Carbonization of Cellulose and Subsequent Pyrolysis

*Katrin Lotz<sup>1</sup>, Annika Wütscher<sup>1</sup>, Hendrik Düdder<sup>1</sup>, Cornelius M. Berger<sup>1</sup>, Carmela Russo<sup>2</sup>,  
Kallol Mukherjee<sup>3</sup>, Gerhard Schwaab<sup>3</sup>, Martina Havenith<sup>3</sup>, Martin Muhler<sup>1,\*</sup>*

1 Laboratory of Industrial Chemistry, Ruhr-University Bochum, Universitätsstraße 150,  
44801 Bochum, Germany

2 Istituto di Ricerche sulla Combustione IRC-CNR, P. Tecchio 80, 80125 Napoli, Italy

3 Physical Chemistry II, Ruhr-University Bochum, Universitätsstraße 150, 44801  
Bochum, Germany

Supporting Information

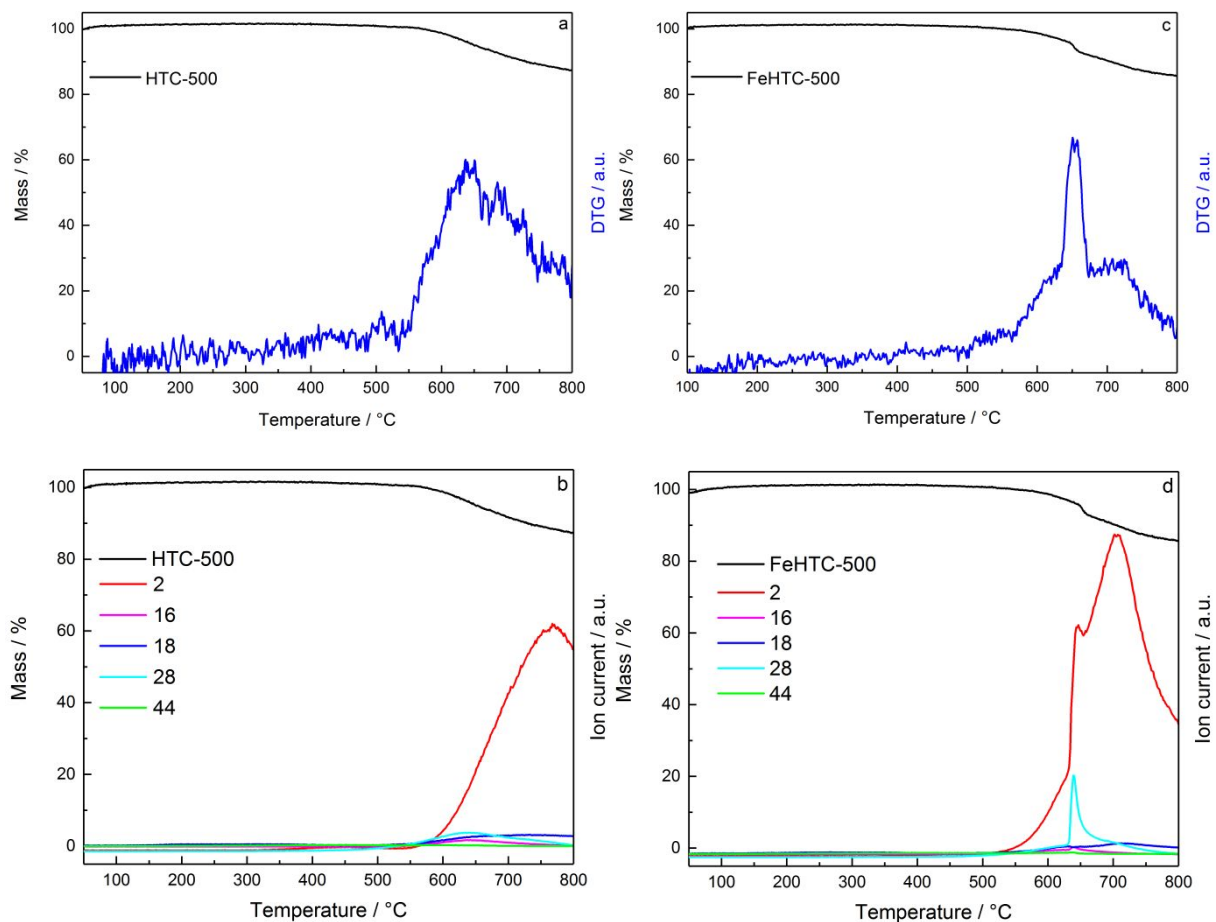

**Figure S1.** Relative mass losses, DTG curves (a,c) and QMS profiles (b,d) of the undoped (a,b) and the iron-loaded carbon materials (c,d) pre-treated at 500 °C during temperature-programmed desorption in He in a thermobalance applying a heating rate of 5 K min<sup>-1</sup>.

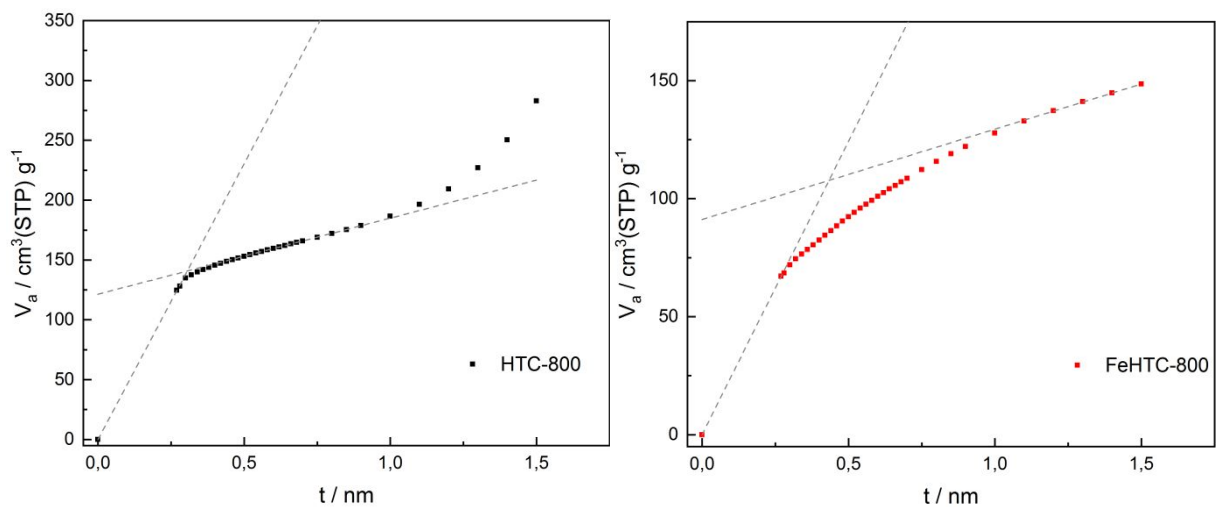

**Figure S2.** t-plots based on the N<sub>2</sub> physisorption measurements of the pure (left) and iron-loaded (right) porous carbon materials pyrolyzed at 800 °C.

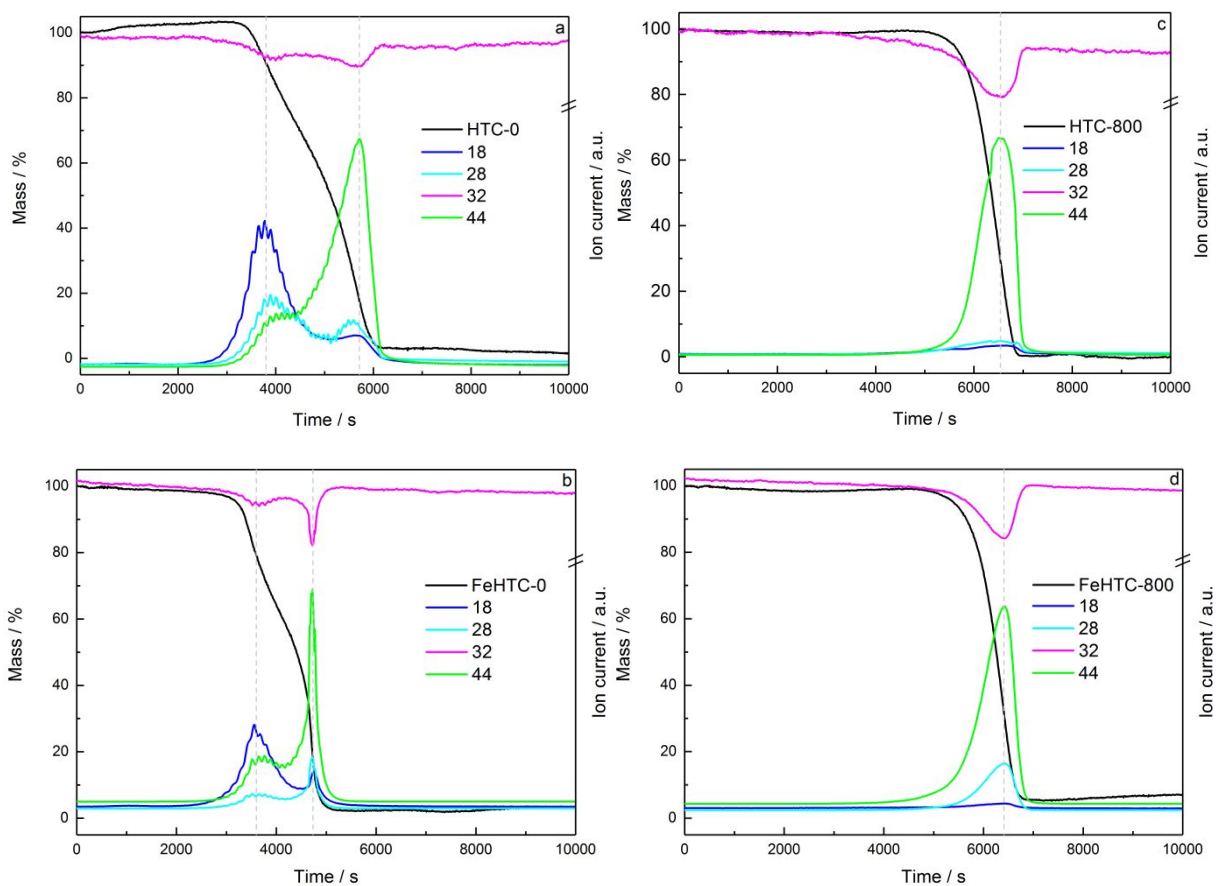

**Figure S3.** Relative mass losses and the QMS profiles of the undoped (a,c) and iron-loaded (b,d) hydrochar (a,b) and the corresponding carbon materials pyrolyzed at 800 °C (c,d) during TPO in 20 % O<sub>2</sub> in He in a thermobalance applying a heating rate of 5 K min<sup>-1</sup>.

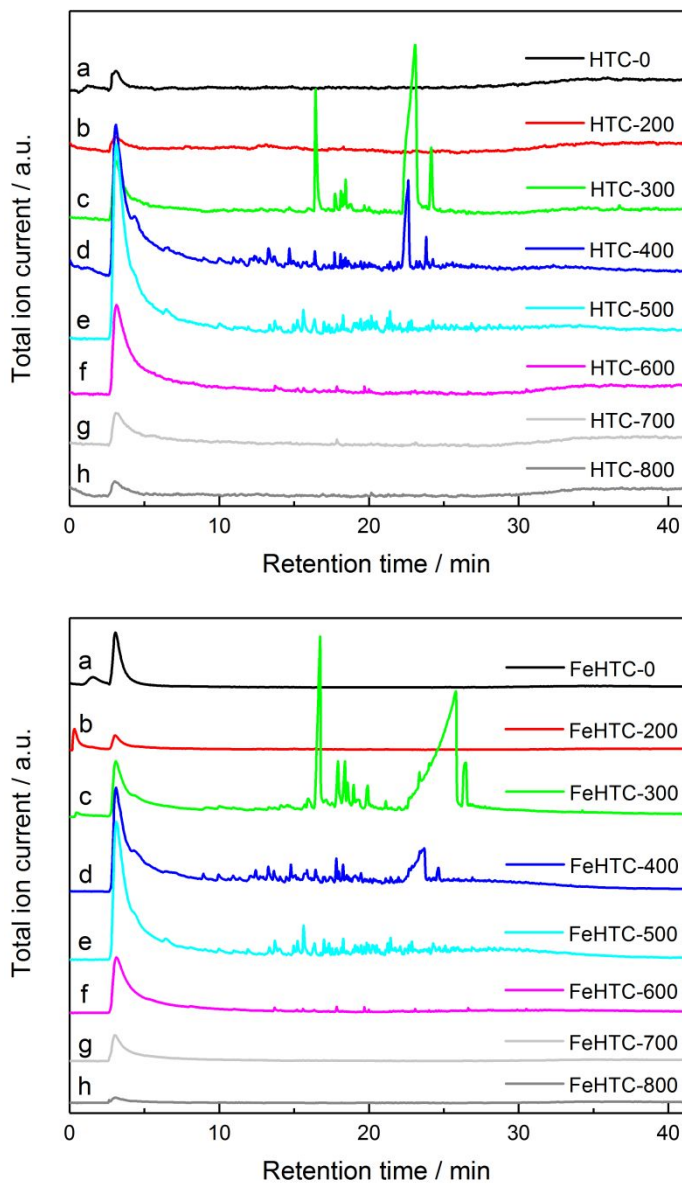

**Figure S4.** Chromatograms of the evolved species of the pure (top) and the iron oxide- loaded hydrochars (bottom) as a function of the pyrolysis temperature during sequential flash pyrolysis in the pyrolysis-GC/MS set-up.

**Table S1.** Compounds evolving during the stepwise pyrolysis of the undoped carbon material at 300 °C.

| Similarity | Compound name                                | Molar mass<br>[g/mol] | Sum formula                                   | Retention time<br>[min] |
|------------|----------------------------------------------|-----------------------|-----------------------------------------------|-------------------------|
|            | CO, H <sub>2</sub> O, CO <sub>2</sub>        | 18, 28, 44            |                                               | 3.06                    |
| 94         | Levogluosenone                               | 126                   | C <sub>6</sub> H <sub>6</sub> O <sub>3</sub>  | 16.41                   |
| 92         | 1,4:3,6-Dianhydro- $\alpha$ -d-glucopyranose | 144                   | C <sub>6</sub> H <sub>8</sub> O <sub>4</sub>  | 18.11                   |
| 80         | 2-Heptanol, 5-ethyl-                         | 144                   | C <sub>9</sub> H <sub>20</sub> O              | 18.31                   |
| 89         | $\beta$ -D-Glucopyranose, anhydro-           | 1,6-<br>162           | C <sub>6</sub> H <sub>10</sub> O <sub>5</sub> | 23.11                   |
| 92         | 1,6-Anhydro- $\beta$ -D-glucofuranose        | 162                   | C <sub>6</sub> H <sub>10</sub> O <sub>5</sub> | 24.16                   |

**Table S2.** Compounds evolving during the stepwise pyrolysis of the undoped carbon material at 400 °C.

| Similarity | Compound name                         | Molar mass<br>[g/mol] | Sum formula                                  | Retention time<br>[min] |
|------------|---------------------------------------|-----------------------|----------------------------------------------|-------------------------|
|            | CO, H <sub>2</sub> O, CO <sub>2</sub> | 18, 28, 44            |                                              | 3.06                    |
| 82         | Furan, 2-methyl-                      | 82                    | C <sub>5</sub> H <sub>6</sub> O              | 4.35                    |
| 87         | Furan, 2,5-dimethyl-                  | 96                    | C <sub>6</sub> H <sub>8</sub> O              | 6.57                    |
| 91         | 2(3H)-Furanone, 5-methyl-             | 98                    | C <sub>5</sub> H <sub>6</sub> O <sub>2</sub> | 10.96                   |
| 87         | 1,2-Cyclopentanedione                 | 98                    | C <sub>5</sub> H <sub>6</sub> O <sub>2</sub> | 12.36                   |

|    |                                              |     |                                               |       |
|----|----------------------------------------------|-----|-----------------------------------------------|-------|
| 93 | 2-Furancarboxaldehyde, 5-methyl-             | 110 | C <sub>6</sub> H <sub>6</sub> O <sub>2</sub>  | 13.30 |
| 94 | 2-Cyclopenten-1-one, 2-hydroxy-3-methyl-     | 112 | C <sub>6</sub> H <sub>8</sub> O <sub>2</sub>  | 14.68 |
| 83 | Phenol, 2-methyl-                            | 108 | C <sub>7</sub> H <sub>8</sub> O               | 15.60 |
| 80 | 2-Furanmethanol                              | 98  | C <sub>5</sub> H <sub>6</sub> O <sub>2</sub>  | 16.38 |
| 82 | 2-Pentanol, 5-(2-propynyloxy)-               | 142 | C <sub>8</sub> H <sub>14</sub> O <sub>2</sub> | 17.70 |
| 91 | 1,4:3,6-Dianhydro- $\alpha$ -d-glucopyranose | 144 | C <sub>6</sub> H <sub>8</sub> O <sub>4</sub>  | 18.10 |
| 82 | 2-Coumaranone                                | 134 | C <sub>8</sub> H <sub>6</sub> O <sub>2</sub>  | 18.60 |
| 87 | 1H-Inden-1-one, 2,3-dihydro-                 | 132 | C <sub>9</sub> H <sub>8</sub> O               | 19.40 |
| 84 | 2-Methyl-5-hydroxybenzofuran                 | 148 | C <sub>9</sub> H <sub>8</sub> O <sub>2</sub>  | 21.41 |
| 91 | $\beta$ -D-Glucopyranose, 1,6-anhydro-       | 162 | C <sub>6</sub> H <sub>10</sub> O <sub>5</sub> | 22.60 |
| 88 | 1,6-Anhydro- $\beta$ -D-glucofuranose        | 162 | C <sub>6</sub> H <sub>10</sub> O <sub>5</sub> | 23.83 |

**Table S3.** Compounds evolving during the stepwise pyrolysis of the undoped carbon material at 500 °C.

| Similarity | Compound name                         | Molar mass [g/mol] | Sum formula                      | Retention time [min] |
|------------|---------------------------------------|--------------------|----------------------------------|----------------------|
|            | CO, H <sub>2</sub> O, CO <sub>2</sub> | 18, 28, 44         |                                  | 3.06                 |
| 93         | Furan, 2,5-dimethyl-                  | 96                 | C <sub>6</sub> H <sub>8</sub> O  | 6.46                 |
| 80         | 2-Cyclopenten-1-one                   | 82                 | C <sub>5</sub> H <sub>6</sub> O  | 10.01                |
| 92         | 2-Cyclopenten-1-one, 3-methyl-        | 96                 | C <sub>6</sub> H <sub>8</sub> O  | 13.38                |
| 92         | Phenol                                | 94                 | C <sub>6</sub> H <sub>6</sub> O  | 13.70                |
| 93         | 2-Cyclopenten-1-one, 2,3-dimethyl-    | 110                | C <sub>7</sub> H <sub>10</sub> O | 14.96                |
| 94         | Phenol, 3-methyl-                     | 108                | C <sub>7</sub> H <sub>8</sub> O  | 15.23                |
| 94         | Phenol, 2-methyl-                     | 108                | C <sub>7</sub> H <sub>8</sub> O  | 15.61                |

|    |                                            |     |                                                |       |
|----|--------------------------------------------|-----|------------------------------------------------|-------|
| 94 | Benzofuran, 2-methyl-                      | 132 | C <sub>9</sub> H <sub>8</sub> O                | 16.36 |
| 95 | Phenol, 2,5-dimethyl-                      | 122 | C <sub>8</sub> H <sub>10</sub> O               | 17.00 |
| 89 | 1H-Indene, 3-methyl-                       | 130 | C <sub>10</sub> H <sub>10</sub>                | 17.13 |
| 90 | Phenol, 3,4-dimethyl-                      | 122 | C <sub>8</sub> H <sub>10</sub> O               | 17.31 |
| 83 | Phenol, 2,3-dimethyl-                      | 122 | C <sub>8</sub> H <sub>10</sub> O               | 17.53 |
| 86 | Phenol, 2,4-dimethyl-                      | 122 | C <sub>8</sub> H <sub>10</sub> O               | 17.78 |
| 80 | Catechol                                   | 110 | C <sub>6</sub> H <sub>6</sub> O <sub>2</sub>   | 17.86 |
| 89 | Benzofuran, 4,7-dimethyl-                  | 146 | C <sub>10</sub> H <sub>10</sub> O              | 18.26 |
| 83 | Hydroquinone                               | 110 | C <sub>6</sub> H <sub>6</sub> O <sub>2</sub>   | 19.01 |
| 90 | Resorcinol                                 | 110 | C <sub>6</sub> H <sub>6</sub> O <sub>2</sub>   | 19.18 |
| 92 | 1H-Inden-1-one, 2,3-dihydro-               | 132 | C <sub>9</sub> H <sub>8</sub> O                | 19.45 |
| 84 | 1,4-Benzenediol, 2-methyl-                 | 124 | C <sub>7</sub> H <sub>8</sub> O <sub>2</sub>   | 20.16 |
| 84 | 2-Methyl-5-hydroxybenzofuran               | 148 | C <sub>9</sub> H <sub>8</sub> O <sub>2</sub>   | 21.23 |
| 81 | Benzaldehyde, 2,4,5-trimethyl-             | 148 | C <sub>10</sub> H <sub>12</sub> O              | 21.40 |
| 80 | 1,4-Benzenedicarboxaldehyde, 2,5-dimethyl- | 162 | C <sub>10</sub> H <sub>10</sub> O <sub>2</sub> | 22.68 |
| 82 | 1-Naphthalenol, 2-methyl-                  | 158 | C <sub>11</sub> H <sub>10</sub> O              | 24.25 |

**Table S4.** Compounds evolving during the stepwise pyrolysis of the iron-loaded carbon material at 300 °C.

| Similarity | Compound name                         | Molar mass [g/mol] | Sum formula                                  | Retention time [min] |
|------------|---------------------------------------|--------------------|----------------------------------------------|----------------------|
|            | CO, H <sub>2</sub> O, CO <sub>2</sub> | 18, 28, 44         |                                              | 3.06                 |
| 81         | 2,5-Dimethyl-4-hydroxy-3(2H)-furanone | 128                | C <sub>6</sub> H <sub>8</sub> O <sub>3</sub> | 15.96                |
| 92         | Levogluosenone                        | 126                | C <sub>6</sub> H <sub>6</sub> O <sub>3</sub> | 16.73                |
| 84         | Heptanal                              | 114                | C <sub>7</sub> H <sub>14</sub> O             | 17.93                |

|    |                                              |     |                                               |       |
|----|----------------------------------------------|-----|-----------------------------------------------|-------|
| 94 | 1,4:3,6-Dianhydro- $\alpha$ -d-glucopyranose | 144 | C <sub>6</sub> H <sub>8</sub> O <sub>4</sub>  | 18.38 |
| 91 | 5-Hydroxymethylfurfural                      | 126 | C <sub>6</sub> H <sub>6</sub> O <sub>3</sub>  | 18.56 |
| 80 | 2-Butene-1,4-diol                            | 88  | C <sub>4</sub> H <sub>8</sub> O <sub>2</sub>  | 18.96 |
| 80 | $\beta$ -d-Ribopyranoside, methyl, 3-acetate | 206 | C <sub>8</sub> H <sub>14</sub> O <sub>6</sub> | 23.36 |
| 80 | $\beta$ -D-Glucopyranose, 1,6-anhydro-       | 162 | C <sub>6</sub> H <sub>10</sub> O <sub>5</sub> | 25.76 |
| 91 | 1,6-Anhydro- $\beta$ -D-glucofuranose        | 162 | C <sub>6</sub> H <sub>10</sub> O <sub>5</sub> | 26.45 |

**Table S5.** Compounds evolving during the stepwise pyrolysis of the iron-loaded carbon material at 400 °C.

| Similarity | Compound name                            | Molar mass<br>[g/mol] | Sum formula                                  | Retention time<br>[min] |
|------------|------------------------------------------|-----------------------|----------------------------------------------|-------------------------|
|            | CO, H <sub>2</sub> O, CO <sub>2</sub>    | 18, 28, 44            |                                              | 3.06                    |
| 82         | Furan, 2-methyl-                         | 82                    | C <sub>5</sub> H <sub>6</sub> O              | 4.33                    |
| 89         | Furan, 2,5-dimethyl-                     | 96                    | C <sub>6</sub> H <sub>8</sub> O              | 6.48                    |
| 80         | 2(5H)-Furanone                           | 84                    | C <sub>4</sub> H <sub>4</sub> O <sub>2</sub> | 8.93                    |
| 82         | 2-Heptanone, 3-methyl-                   | 128                   | C <sub>8</sub> H <sub>16</sub> O             | 10.61                   |
| 88         | 2(3H)-Furanone, 5-methyl-                | 98                    | C <sub>5</sub> H <sub>6</sub> O <sub>2</sub> | 10.93                   |
| 85         | 4-Cyclopentene-1,3-dione                 | 96                    | C <sub>5</sub> H <sub>4</sub> O <sub>2</sub> | 11.37                   |
| 91         | Ethanone, 1-(2-furanyl)-                 | 110                   | C <sub>6</sub> H <sub>6</sub> O <sub>2</sub> | 12.06                   |
| 88         | 1,2-Cyclopentanedione                    | 98                    | C <sub>5</sub> H <sub>6</sub> O <sub>2</sub> | 12.41                   |
| 89         | 2(5H)-Furanone, 5-methyl-                | 98                    | C <sub>5</sub> H <sub>6</sub> O <sub>2</sub> | 12.71                   |
| 90         | 2-Furancarboxaldehyde, 5-methyl-         | 110                   | C <sub>6</sub> H <sub>6</sub> O <sub>2</sub> | 13.23                   |
| 85         | 1,4-Cyclohexanedione                     | 112                   | C <sub>6</sub> H <sub>8</sub> O <sub>2</sub> | 14.47                   |
| 94         | 2-Cyclopenten-1-one, 2-hydroxy-3-methyl- | 112                   | C <sub>6</sub> H <sub>8</sub> O <sub>2</sub> | 14.78                   |
| 83         | 2-Cyclopenten-1-one, 2,3-dimethyl-       | 110                   | C <sub>7</sub> H <sub>10</sub> O             | 15.00                   |



|    |                                              |     |                                               |       |
|----|----------------------------------------------|-----|-----------------------------------------------|-------|
| 88 | Phenol, 2-methyl-                            | 108 | C <sub>7</sub> H <sub>8</sub> O               | 15.26 |
| 88 | Phenol, 3-methyl-                            | 108 | C <sub>7</sub> H <sub>8</sub> O               | 15.66 |
| 80 | 2,5-Dimethyl-4-hydroxy-3(2H)-furanone        | 128 | C <sub>6</sub> H <sub>8</sub> O <sub>3</sub>  | 15.86 |
| 88 | Levoglucosenone                              | 126 | C <sub>6</sub> H <sub>6</sub> O <sub>3</sub>  | 16.41 |
| 83 | But-1-ene-3-yne, 1-ethoxy-                   | 96  | C <sub>6</sub> H <sub>8</sub> O               | 16.93 |
| 81 | Heptanal                                     | 114 | C <sub>7</sub> H <sub>14</sub> O              | 17.80 |
| 93 | Catechol                                     | 110 | C <sub>6</sub> H <sub>6</sub> O <sub>2</sub>  | 17.96 |
| 89 | 1,4:3,6-Dianhydro- $\alpha$ -d-glucopyranose | 144 | C <sub>6</sub> H <sub>8</sub> O <sub>4</sub>  | 18.25 |
| 92 | 2-Coumaranone                                | 134 | C <sub>8</sub> H <sub>6</sub> O <sub>2</sub>  | 18.63 |
| 82 | 1H-Inden-1-one, 2,3-dihydro-                 | 132 | C <sub>9</sub> H <sub>8</sub> O               | 19.46 |
| 85 | Ethanone, 1-(3-hydroxyphenyl)-               | 136 | C <sub>8</sub> H <sub>8</sub> O <sub>2</sub>  | 21.11 |
| 85 | 2-Methyl-5-hydroxybenzofuran                 | 148 | C <sub>9</sub> H <sub>8</sub> O <sub>2</sub>  | 21.45 |
| 80 | $\beta$ -D-Glucopyranose, 1,6-anhydro-       | 162 | C <sub>6</sub> H <sub>10</sub> O <sub>5</sub> | 23.70 |
| 80 | 1,6-Anhydro- $\beta$ -D-glucofuranose        | 162 | C <sub>6</sub> H <sub>10</sub> O <sub>5</sub> | 24.63 |

**Table S6.** Compounds evolving during the stepwise pyrolysis of the iron-loaded carbon material at 500 °C.

| Similarity | Compound name                         | Molar mass [g/mol] | Sum formula                     | Retention time [min] |
|------------|---------------------------------------|--------------------|---------------------------------|----------------------|
|            | CO, H <sub>2</sub> O, CO <sub>2</sub> | 18, 28, 44         |                                 | 3.06                 |
| 95         | Furan, 2,5-dimethyl-                  | 96                 | C <sub>6</sub> H <sub>8</sub> O | 6.46                 |
| 89         | 2-Cyclopenten-1-one                   | 82                 | C <sub>5</sub> H <sub>6</sub> O | 9.96                 |
| 92         | p-Xylene                              | 106                | C <sub>8</sub> H <sub>10</sub>  | 11.00                |
| 96         | 2-Cyclopenten-1-one, 2-methyl-        | 96                 | C <sub>6</sub> H <sub>8</sub> O | 11.91                |
| 87         | 2-Cyclopenten-1-one, 3-methyl-        | 96                 | C <sub>6</sub> H <sub>8</sub> O | 13.38                |

|    |                                           |     |                                              |       |
|----|-------------------------------------------|-----|----------------------------------------------|-------|
| 97 | Phenol                                    | 94  | C <sub>6</sub> H <sub>6</sub> O              | 13.73 |
| 80 | Benzene, 1,2,4-trimethyl-                 | 120 | C <sub>9</sub> H <sub>12</sub>               | 14.00 |
| 92 | 2-Cyclopenten-1-one, 2,3-dimethyl-        | 110 | C <sub>7</sub> H <sub>10</sub> O             | 14.96 |
| 95 | Phenol, 3-methyl- Methylphenol            | 108 | C <sub>7</sub> H <sub>8</sub> O              | 15.23 |
| 89 | Phenol, 2-methyl-                         | 108 | C <sub>7</sub> H <sub>8</sub> O              | 15.61 |
| 94 | Benzofuran, 2-methyl-                     | 132 | C <sub>9</sub> H <sub>8</sub> O              | 16.35 |
| 95 | Phenol, 2,5-dimethyl-                     | 122 | C <sub>8</sub> H <sub>10</sub> O             | 16.98 |
| 90 | 1H-Indene, 3-methyl-                      | 130 | C <sub>10</sub> H <sub>10</sub>              | 17.13 |
| 94 | Phenol, 3,4-dimethyl-                     | 122 | C <sub>8</sub> H <sub>10</sub> O             | 17.31 |
| 84 | Phenol, 2,3-dimethyl-                     | 122 | C <sub>8</sub> H <sub>10</sub> O             | 17.55 |
| 88 | Phenol, 2,4-dimethyl-                     | 122 | C <sub>8</sub> H <sub>10</sub> O             | 17.80 |
| 90 | Catechol                                  | 110 | C <sub>6</sub> H <sub>6</sub> O <sub>2</sub> | 17.86 |
| 91 | Benzofuran, 4,7-dimethyl-                 | 146 | C <sub>10</sub> H <sub>10</sub> O            | 18.28 |
| 83 | 1,2-Benzenediol, 3-methyl-                | 124 | C <sub>7</sub> H <sub>8</sub> O <sub>2</sub> | 18.93 |
| 93 | Resorcinol                                | 110 | C <sub>6</sub> H <sub>6</sub> O <sub>2</sub> | 19.25 |
| 95 | 1H-Inden-1-one, 2,3-dihydro-              | 132 | C <sub>9</sub> H <sub>8</sub> O              | 19.46 |
| 82 | Naphthalene, 1-methyl-                    | 142 | C <sub>11</sub> H <sub>10</sub>              | 19.70 |
| 80 | 1H-Inden-1-one, 2,3-dihydro-3,3-dimethyl- | 160 | C <sub>11</sub> H <sub>12</sub> O            | 19.85 |
| 87 | 1,4-Benzenediol, 2-methyl-                | 124 | C <sub>7</sub> H <sub>8</sub> O <sub>2</sub> | 20.23 |
| 82 | 2-Methyl-5-hydroxybenzofuran              | 148 | C <sub>9</sub> H <sub>8</sub> O <sub>2</sub> | 21.26 |
| 84 | 1,4-Benzenedicarboxaldehyde, 2-methyl-    | 148 | C <sub>9</sub> H <sub>8</sub> O <sub>2</sub> | 21.45 |
| 86 | 1-Naphthalenol, 2-methyl-                 | 158 | C <sub>11</sub> H <sub>10</sub> O            | 24.28 |

---
